# Supplementary material
Source: Research Square preprint supplement (doi:10.21203/rs.3.rs-9904606/v1)
Supplement: Supplementary file 1 [file 0be82237c050f67d2aaf29c0.docx]

**Supplementary Figures**

**
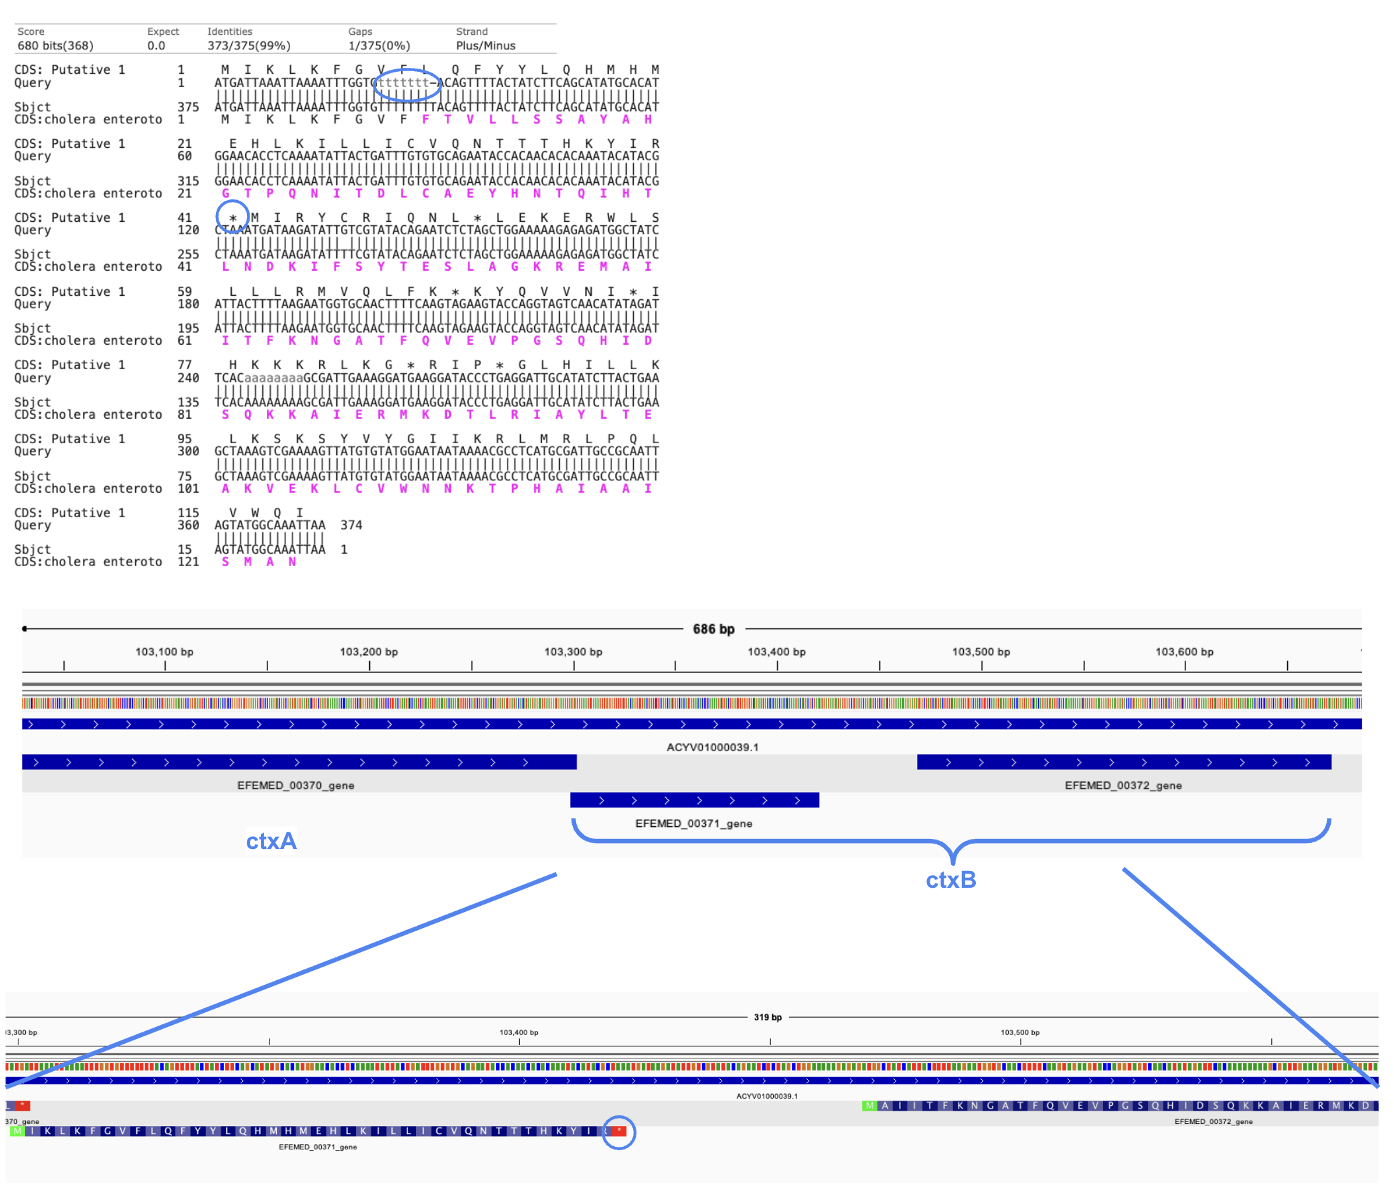
**

Figure S1. Deletion in homopolymeric region resulting in premature stop codon in some copies of *V. mimicus ctxB.*

**
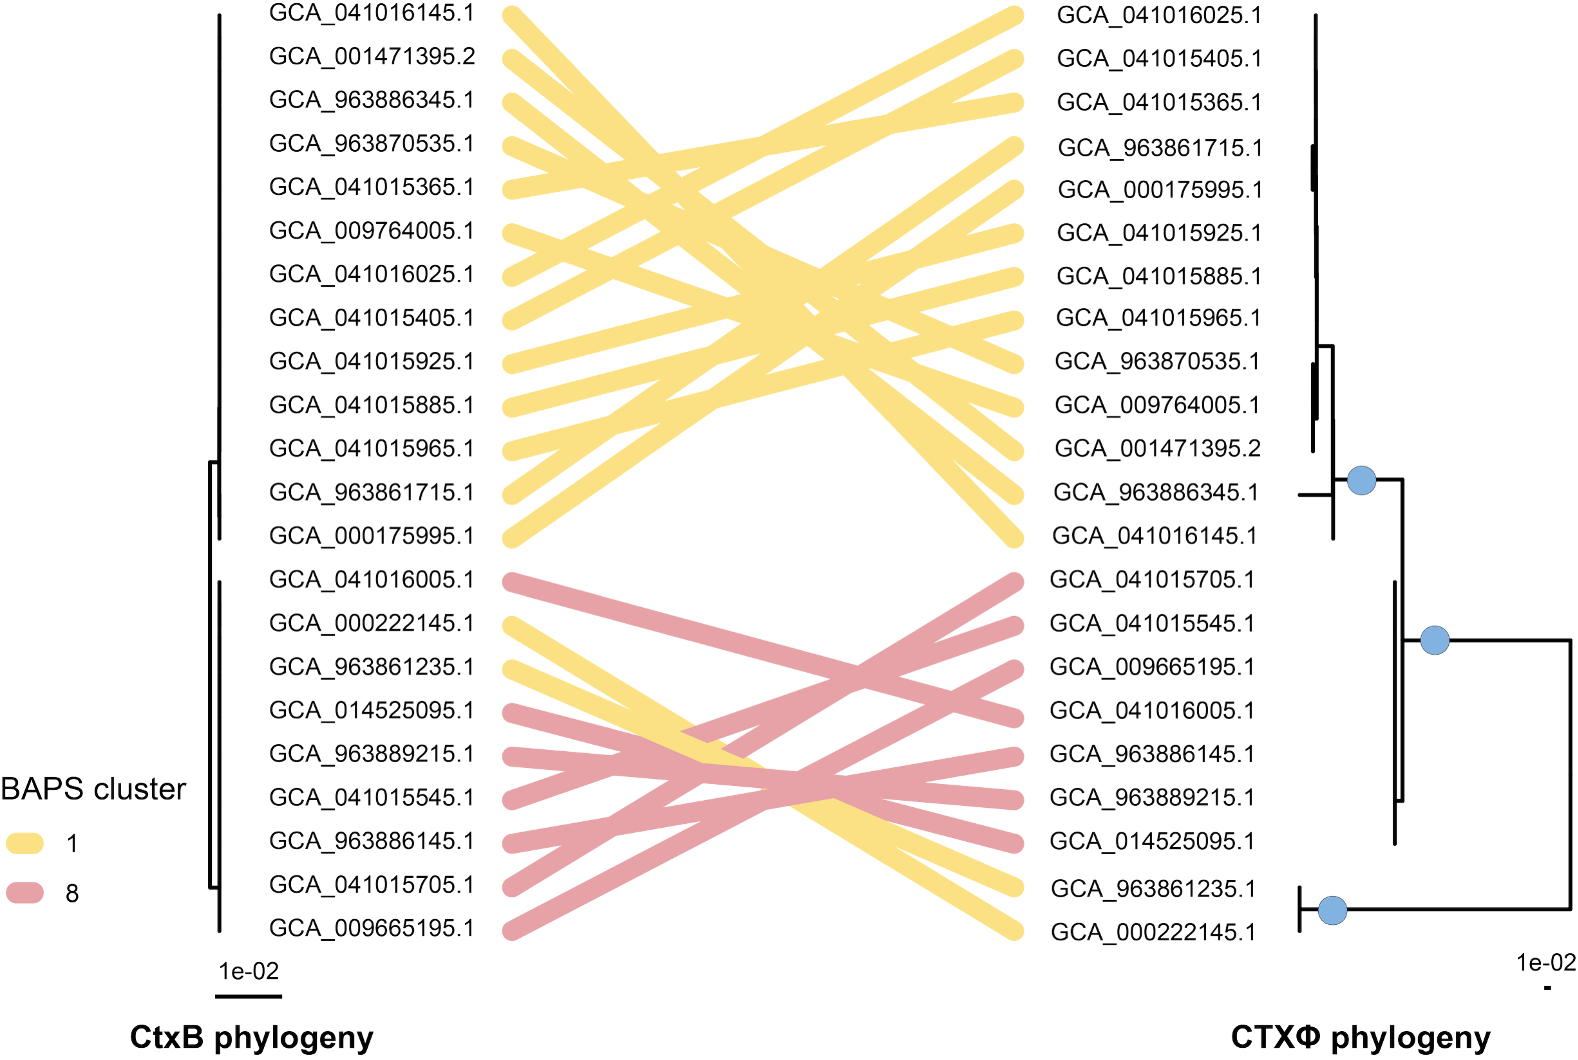
**

Figure S2. Maximum likelihood phylogenetic tree generated from ctxB sequences (left) and from the complete CTXφ (right); linked by position on WGS phylogenetic tree, denoted by links coloured by BAPS cluster; blue circles on nodes of the CTXφ phylogeny indicate putative CTXφ introduction events

**
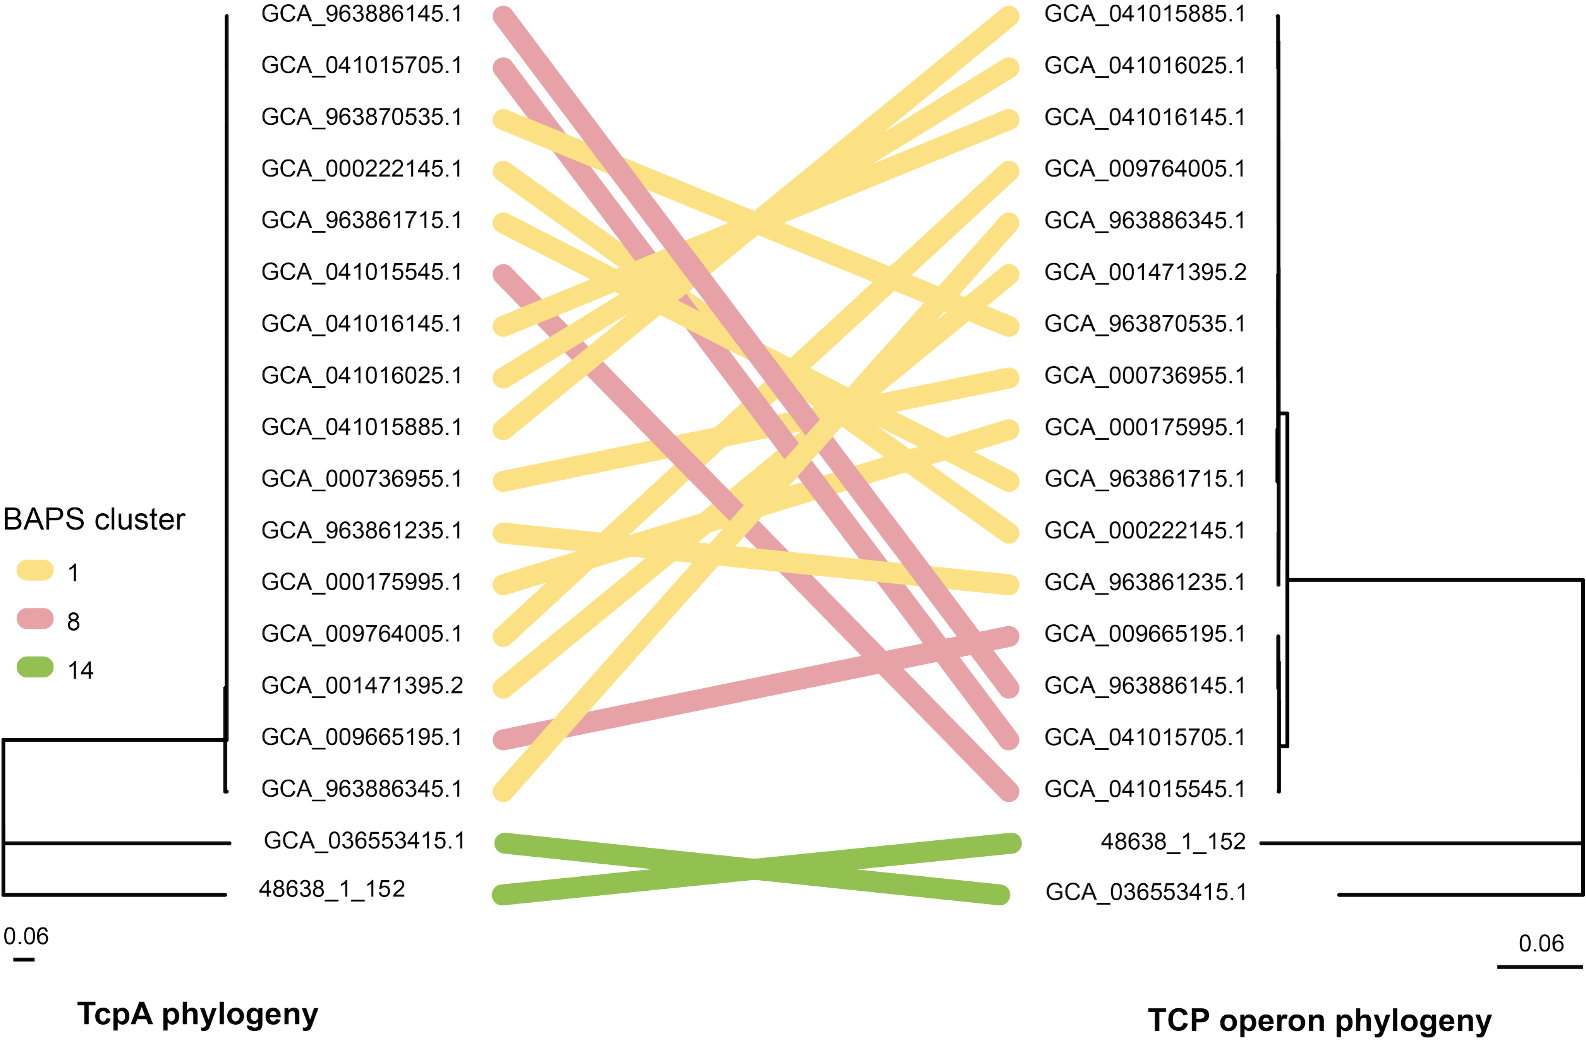
**

Figure S3. Maximum likelihood phylogenetic tree generated from *tcpA* sequences (left) and from the complete TCP open (right); linked by position on WGS phylogenetic tree, denoted by links coloured by BAPS cluster


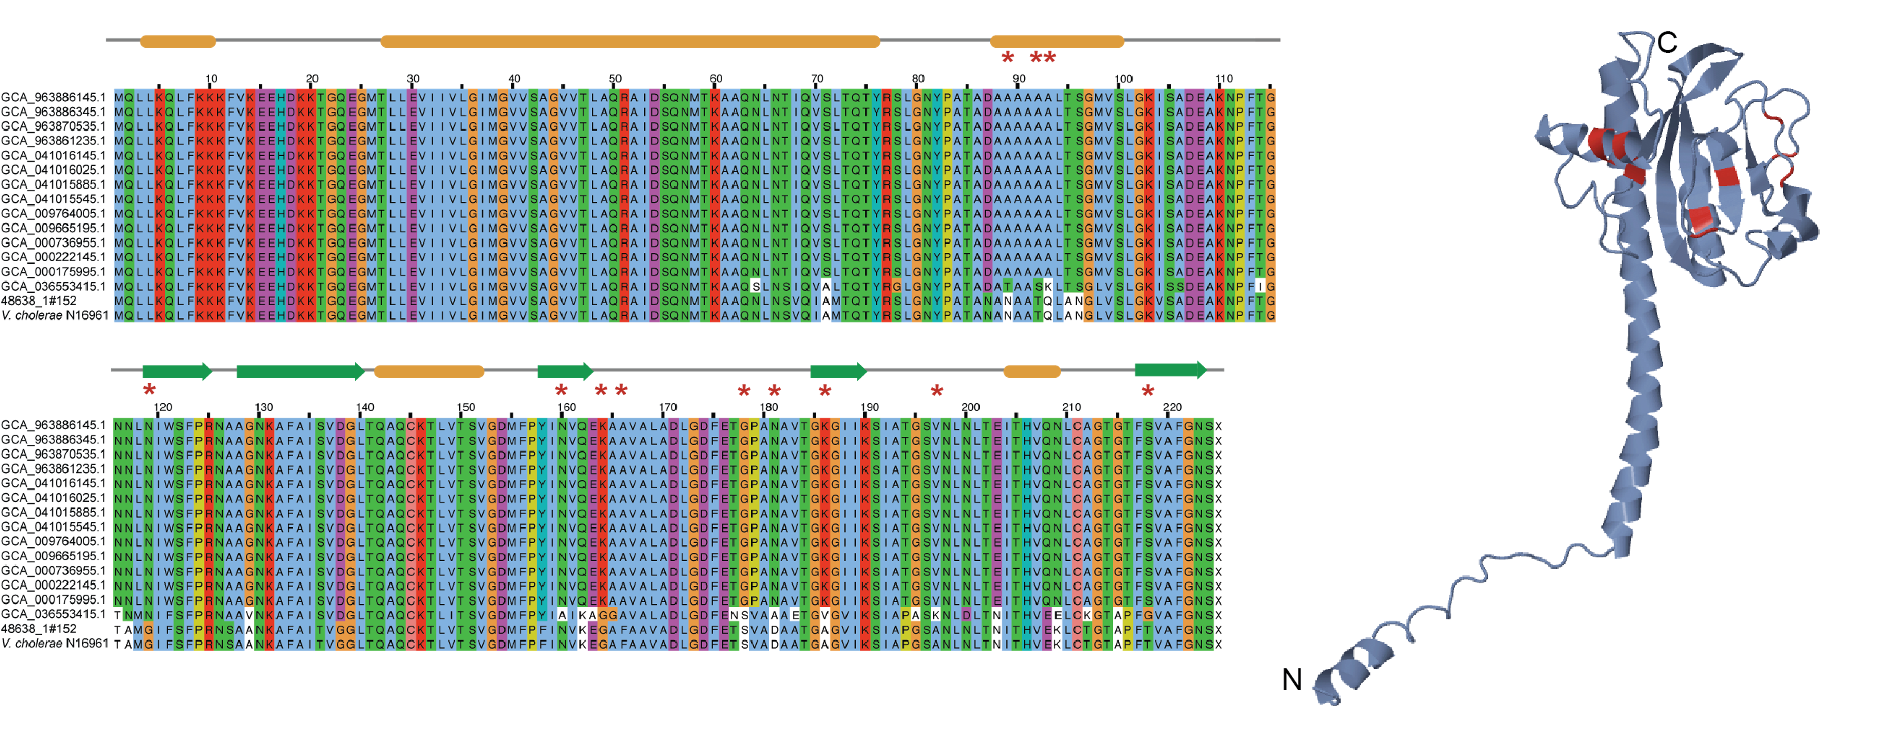


Figure S4. Alignment of *tcpA* amino acid sequences in *V. mimicus* with *tcpA* in *V. cholerae* reference strain N16961 (left); predicted structure of *V. mimicus* TcpA (right); α-helices are denoted by yellow ovals and β-sheets by green arrows above the alignment; red stars and red residues in the structure represent positively-selected residues differentiating TcpA in *V. mimicus* and *V. cholerae*
